# Supplementary material for: Topically Applied Biopolymer-Based Tri-Layered Hierarchically Structured Nanofibrous Scaffold with a Self-Pumping Effect for Accelerated Full-Thickness Wound Healing in a Rat Model
Source: MDPI journal article supplement (doi:10.3390/pharmaceutics15051518), 2023-05-17
Supplement: s1 [file s1]

# Supplementary materials

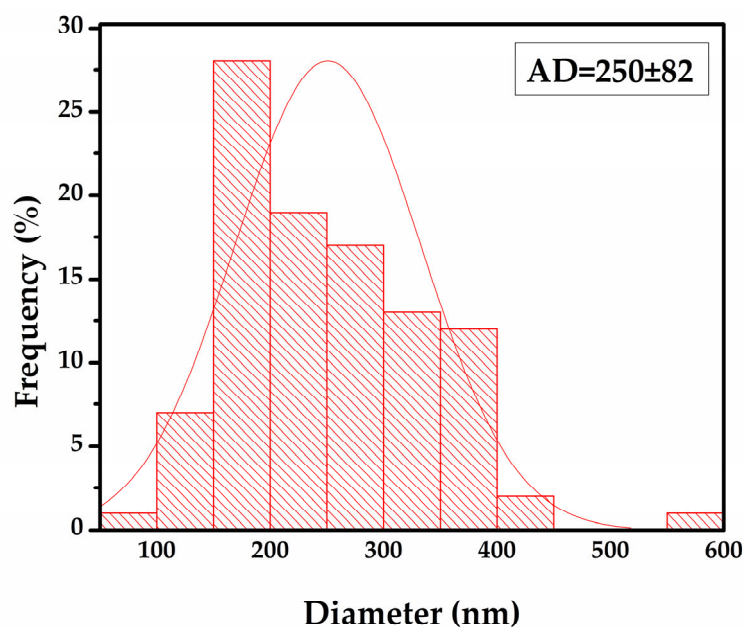

**Figure S1.** Average diameter distribution of SF/PEO.

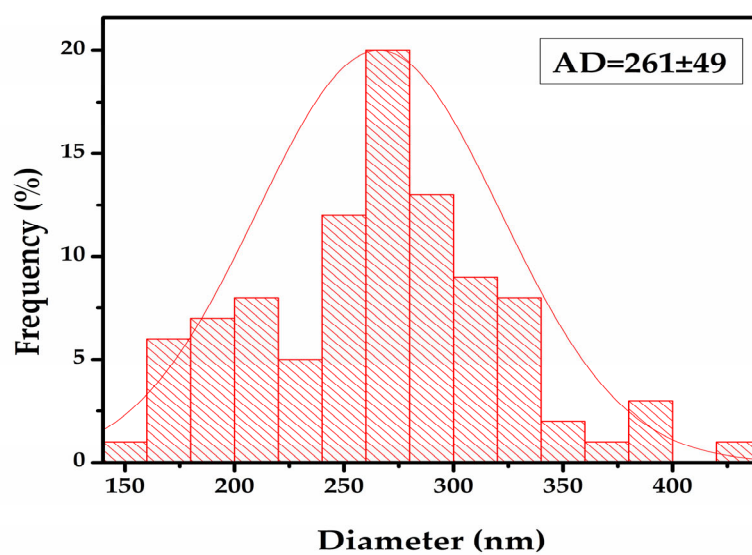

**Figure S2.** Average diameter distribution of PHB.

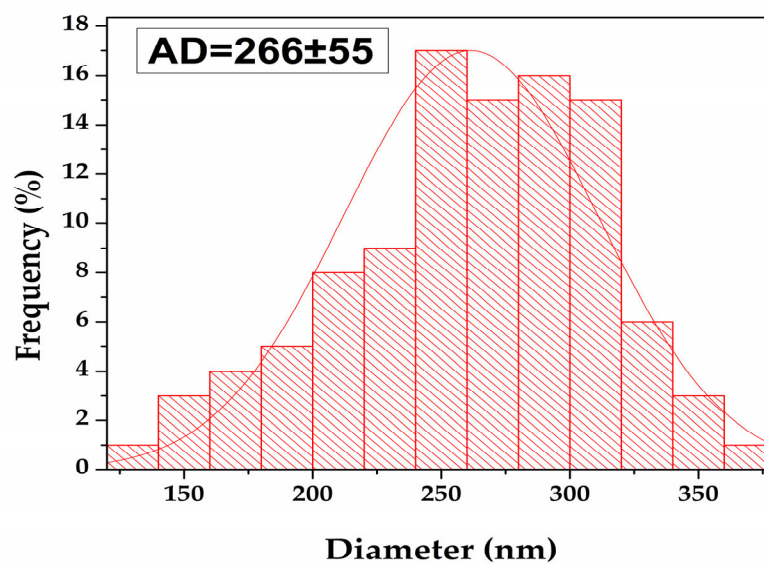

Figure S3. Average diameter distribution of Col/PEO.

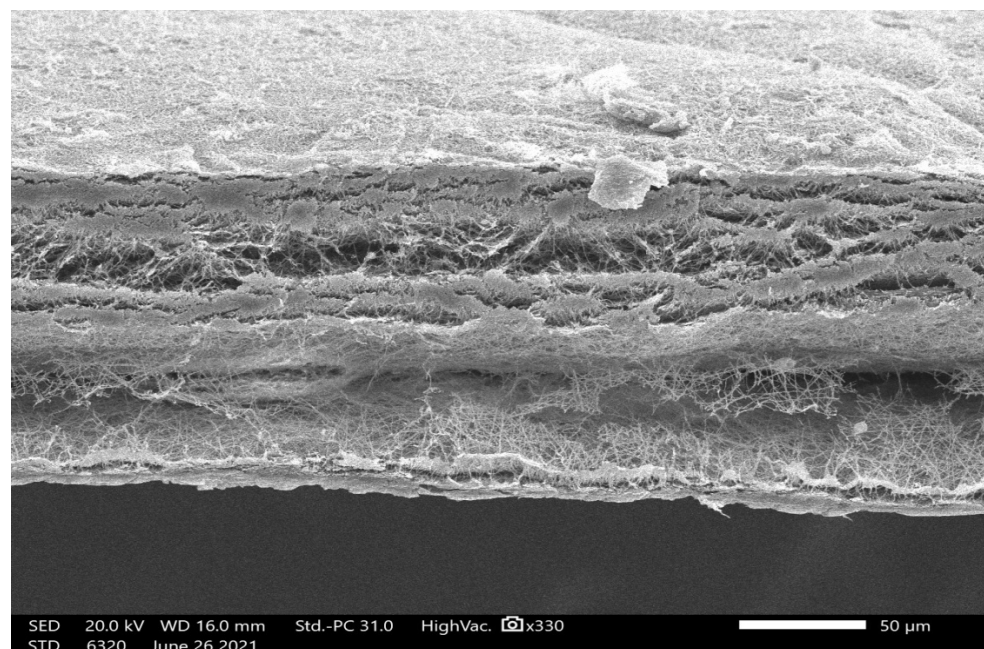

Figure S4. SEM cross sectional photograph of SF/PEO/PHB/Col/PEO.
